# Supplementary material for: Modulation of interparticle gap for enhanced SERS sensitivity in chemically stable Ag@Au hetero-architectures
Source: Royal Society of Chemistry journal article supplement (doi:10.1039/d0nj02657c), 2020-01-01
Supplement: d0nj02657c1.pdf [file d0nj02657c1.pdf]

**Electronic Supplementary Information for New Journal of Chemistry**

**Modulating of Interparticle Gap for Enhanced SERS Sensitivity in Chemically Stable Ag@Au Hetero-Architectures**

Chunfang Wu<sup>a,b,\*</sup>, Qing Hu<sup>a</sup>, Melissa Benison<sup>b</sup>, Karen Faulds<sup>b</sup>, Duncan Graham<sup>b</sup>

<sup>a</sup> School of Optoelectronic Engineering, Xi'an Technological University, Xi'an, 710021, P.R.China

<sup>b</sup> Department of Pure and Applied Chemistry, University of Strathclyde, Glasgow, G1 1RD, UK

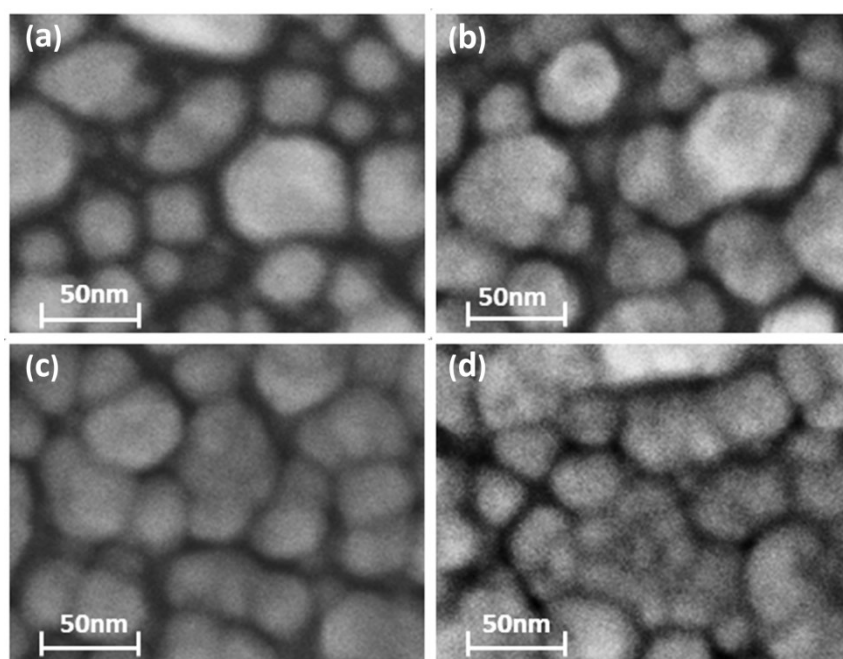

*Fig. S1 The magnified SEM images of sample (a) Ag, (b) Ag@Au4, (c) Ag@Au8 and (d) Ag@Ag12.*

The magnified SEM images for all samples were shown herein to clearly display morphologies change in the Ag@Au hetero-architectures. Apparently, accompanying with increase in the thickness of Au particle films, the particle sizes of Ag@Au hetero-architectures gradually increased and on the contrary the interparticle gap between two adjacent particles decreased.

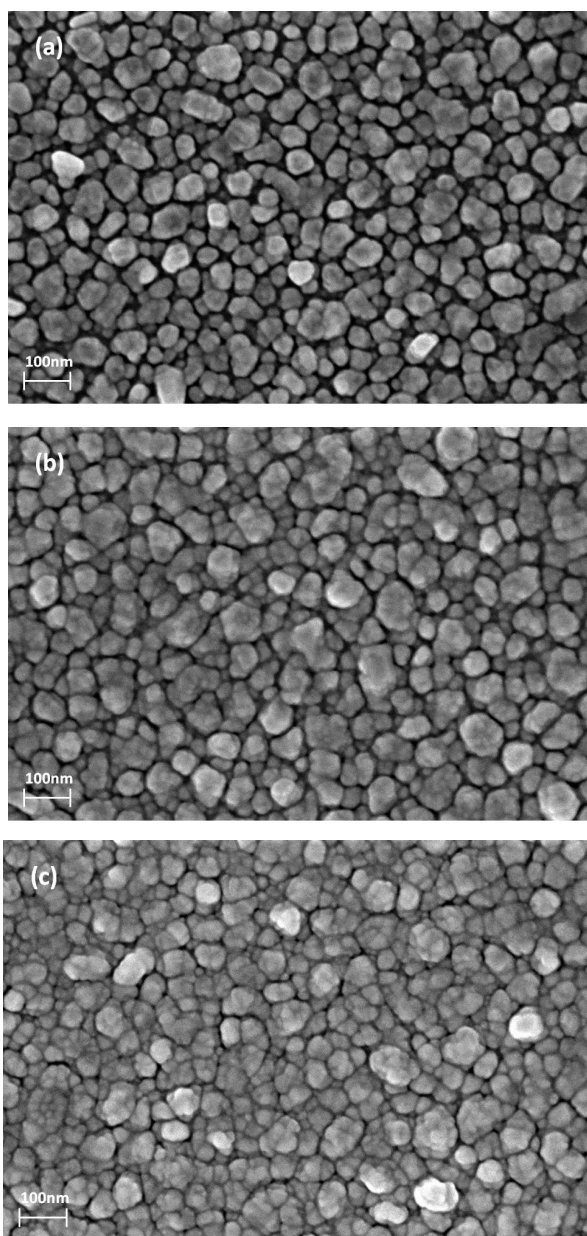

*Fig. S2 SEM images of the substrates: (a) Ag@Au4, (b) Ag@Au8 and (c) Ag@Ag12 upon immersion in H<sub>2</sub>O<sub>2</sub> solution at concentration of 0.5M for 1h.*

To assess the chemical stability of the Ag and Ag@Au substrates, the substrates were submerged in a 0.5 M hydrogen peroxide solution (H<sub>2</sub>O<sub>2</sub>) for 1 h. It is known that a violent reaction between Ag and H<sub>2</sub>O<sub>2</sub> occurs and Ag nanoparticles could be completely dissolved in a short time. The reaction between Ag and H<sub>2</sub>O<sub>2</sub> is given in equation (1).

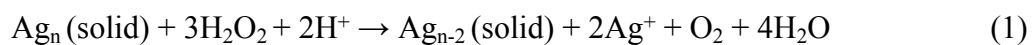

FE-SEM observations could confirm that no Ag nanoparticles remain on the Si wafer after immersion in the H<sub>2</sub>O<sub>2</sub> solution for a while (not shown here). However,

for Ag@Au substrates, the decomposition of Ag nanoparticles by H<sub>2</sub>O<sub>2</sub> was greatly reduced due to the protection from Au films. Comparing the FE-SEM images of the Ag@Au substrates before (Fig. 2 b, c, d) and after (Fig. S2 a, b, c) immersion in the H<sub>2</sub>O<sub>2</sub> solution, very little change can be observed. However, the formation of bubbles confirmed that reactions do occur between H<sub>2</sub>O<sub>2</sub> and both Ag@Au<sub>4</sub> and Ag@Au<sub>8</sub> substrates. It is probable that the dissolution of some uncoated Ag from the Ag@Au<sub>4</sub> and Ag@Au<sub>8</sub> nanoparticles by reaction with H<sub>2</sub>O<sub>2</sub> results in some pinholes that cannot be detected by FE-SEM.

In order to prove the repeatability of our as-prepared Ag and Ag@Au NPs SERS substrates, we carried out the parallel SERS experiment on another batch of samples to detect R6G molecule. The results of the second batch of substrates (shown in Table S3) demonstrate the similar trend in terms of EF as those listed in Table 3, viz. increasing as thickness of Au layer increases up to 8 nm, then decreasing as it increases.

**Table S1 Enhancement factor of four SERS substrates prepared via another batch of experiment**

| Sample              | Test site | Enhancement factor (EF) | Average value of EF  | Deviation from average value of EF |
|---------------------|-----------|-------------------------|----------------------|------------------------------------|
| Ag                  | #1        | 1.72×10 <sup>7</sup>    | 1.65×10 <sup>7</sup> | +4%                                |
|                     | #2        | 1.54×10 <sup>7</sup>    |                      | -7%                                |
|                     | #3        | 1.69×10 <sup>7</sup>    |                      | +2%                                |
| Ag@Au <sub>4</sub>  | #1        | 1.85×10 <sup>7</sup>    | 1.89×10 <sup>7</sup> | -2%                                |
|                     | #2        | 1.77×10 <sup>7</sup>    |                      | -6%                                |
|                     | #3        | 2.05×10 <sup>7</sup>    |                      | +8%                                |
| Ag@Au <sub>8</sub>  | #1        | 2.20×10 <sup>7</sup>    | 2.23×10 <sup>7</sup> | -1%                                |
|                     | #2        | 2.36×10 <sup>7</sup>    |                      | +6%                                |
|                     | #3        | 2.13×10 <sup>7</sup>    |                      | -4%                                |
| Ag@Au <sub>12</sub> | #1        | 0.53×10 <sup>7</sup>    | 0.50×10 <sup>7</sup> | +6%                                |
|                     | #2        | 0.46×10 <sup>7</sup>    |                      | -8%                                |
|                     | #3        | 0.51×10 <sup>7</sup>    |                      | +2%                                |
